# Supplementary material for: Preclinical evaluation of AAV9-coSMN1 gene therapy for spinal muscular atrophy: efficacy and safety in mouse models and non-human primates
Source: Mol Med. 2025 Apr 29;31:158. doi: 10.1186/s10020-025-01207-4 (PMC12042585; doi:10.1186/s10020-025-01207-4)
Supplement: Supplementary file 1 — Additional file 1. [file 10020_2025_1207_MOESM1_ESM.xlsx]

## Sheet: Sheet1
WEEK 2									WEEK 6									WEEK 13
Dose	Sample	Animal No.(Female)			Animal No.(male)				Dose	Sample	Animal No.(Female)			Animal No.(male)				Dose	Sample	Animal No.(Female)			Animal No.(male)
(vg/kg)		238	239	240	248	249	250		(vg/kg)		43	44	45	58	59	60		(vg/kg)		158	159	160	168	169	170
2.5×1013	liver	9380	30200	27500	7540	3740	1310		2.5×1013	liver	NA	185	721	42.7	607	5060		2.5×1013	liver	5310	17200	1690	1700	4950	14000
	heart	19600	28000	423000	80400	17700	6910			heart	56300	67400	1580	NA	47100	12800			heart	9520	49100	35300	123000	85700	116000
	Spleen	267	441	4310	317	564	203			Spleen	127000	2400	741	82.1	NA	123			Spleen	4580	50.4	NA	86	573	1200
	lung	9400	10900	55300	9230	2690	1300			lung	23500	2960	2380	6620	1940	2260			lung	1390	3590	6420	4170	10000	10900
	kidney	7060	8280	59800	11900	2850	2100			kidney	15200	1870	147	304	901	201			kidney	1500	1000	979	490	1250	31800
	brain	138000	287000	1840000	338000	20300	67300			brain	170000	120000	261000	86500	317000	180000			brain	2400	306000	279000	141000	1280000	286000
	spinal cord	14500	29100	583000	194000	14100	15300			spinal cord	99000	43500	16500	27400	27100	30100			spinal cord	6160	51400	39000	46900	132000	53400
	ovary/testis	591	1080	4210	1050	207	NA			ovary/testis	NA	164	NA	120	NA	6120			ovary/testis	NA	NA	NA	NA	NA	2330
	uterus/Epididymis	237	4600	4110	4690	499	182			uterus/Epididymis	265000	18000	NA	166	181	127			uterus/Epididymis	277	NA	221	166	8790	414
	ileum	933	1110	5160	177	1390	1510			ileum	2700	1480	137	1830	292	NA			ileum	48400	347	366	NA	372	842
	colon	175	1980	9350	1880	5270	3130			colon	1240	197	93.4	182	198	3940			colon	7120	211	757	497	383	3820
	triceps muscle of arm	12400	19600	83000	21200	21000	7910			triceps muscle of arm	256000	7090	5620	3360	7810	2460			triceps muscle of arm	566	11200	7660	11900	29500	39100
	quadriceps femoris	7340	8820	122000	20900	7430	3040			quadriceps femoris	16100	3840	5310	5050	4960	952			quadriceps femoris	4800	17200	8680	10400	19500	27700
	blood	9630	15900	73200	58500	13400	6750			blood	1180	1190	1020	NA	NA	NA			blood	NA	NA	NA	NA	9780	868000
Dose	Sample	Animal No.(Female)			Animal No.(male)				Dose	Sample	Animal No.(Female)			Animal No.(male)				Dose	Sample	Animal No.(Female)			Animal No.(male)
(vg/kg)		258	259	260	268	269	270		(vg/kg)		73	74	75	88	89	90		(vg/kg)		178	179	180	188	189	190
5.7×1013	liver	54400	77400	12900	14100	2520	2150		5.7×1013	liver	1690	2200	3820	1460	2500	4610		5.7×1013	liver	3900	2290	2050	1940	5480	425
	heart	56800	126000	147000	90000	14600	9200			heart	84100	106000	67100	115000	217000	240000			heart	36300	61800	28300	61900	3240	47800
	Spleen	2790	2310	867	934	NA	315			Spleen	212	494	594	837	359	302			Spleen	2140	222	72.2	1960	NA	381
	lung	39100	15600	17500	11200	969	1730			lung	18200	27400	7290	8040	11000	8500			lung	5320	51200	5490	3750	2190	5110
	kidney	7020	5080	9230	6430	362	510			kidney	631	861	1660	1100	3290	1100			kidney	497	767	269	724	606	1500
	brain	455000	424000	255000	301000	154000	40100			brain	106000	662000	718000	607000	674000	442000			brain	357000	82800	178000	308000	12100	1010000
	spinal cord	65600	28800	NA	76600	12400	21700			spinal cord	NA	NA	181	368	149000	110000			spinal cord	13600	45300	78000	48100	19800	58100
	ovary/testis	2450	3280	2560	174	225	NA			ovary/testis	NA	159	NA	1010	441	238			ovary/testis	282	519	2570	493	1630	NA
	uterus/Epididymis	7010	1480	3230	2340	NA	311			uterus/Epididymis	70	212	533	2820	2240	112			uterus/Epididymis	1800	273	41.2	NA	647	625
	ileum	14500	4060	1710	1340	NA	1030			ileum	685	149	603	NA	3370	94.1			ileum	NA	7590	3830	438	1030	312
	colon	4750	1300	1410	1580	256	782			colon	170	559	145	136	899	197			colon	7720	1830	216	365	1450	121
	triceps muscle of arm	107000	10000	82900	56500	3640	3820			triceps muscle of arm	27500	29700	12200	32500	27500	29500			triceps muscle of arm	5210	2650	1330	4170	2030	15300
	quadriceps femoris	28300	22700	44900	20600	1880	1430			quadriceps femoris	16100	10800	5870	18700	14400	6350			quadriceps femoris	2450	1820	2210	1800	1130	23200
	blood	77700	86200	37300	127000	NA	NA			blood	211000	194000	189000	243000	NA	NA			blood	1930	NA	5920	1990	NA	NA
Dose	Sample	Animal No.(Female)			Animal No.(male)				Dose	Sample	Animal No.(Female)			Animal No.(male)				Dose	Sample	Animal No.(Female)			Animal No.(male)
(vg/kg)		278	279	280	287	289	286		(vg/kg)		102	104	105	118	119	120		(vg/kg)		198	199	200	208	209	210
1.9×1014	liver	44100	2810	24000	49900	163000	85300		1.9×1014	liver	17200	9110	46100	7720	16500	3800		1.9×1014	liver	17200	12000	2180	6930	5110	6720
	heart	567000	37600	114000	420000	879000	267000			heart	138000	90800	72400	219000	84900	156000			heart	270000	331000	160000	279000	222000	48400
	Spleen	7940	2690	92800	6680	12800	2860			Spleen	3630	818	8590	249	723	3240			Spleen	677	960	574	1910	4230	131
	lung	66900	2940	396000	78400	291000	26200			lung	77500	22500	133000	22700	15300	29400			lung	10200	37600	18600	50700	16700	3570
	kidney	23900	NA	55100	20900	64100	13200			kidney	4100	2980	11000	4060	2610	4850			kidney	6820	969	4770	4550	2270	1270
	brain	2320000	312000	345000	1260000	3110000	1280000			brain	611000	325000	1350000	321000	220000	409000			brain	730000	1350000	152000	894000	730000	489000
	spinal cord	258000	31400	51300	188000	696000	244000			spinal cord	181000	316000	342000	132000	125000	185000			spinal cord	348000	452000	282000	924000	402000	29400
	ovary/testis	8280	922	4840	1430	6920	1080			ovary/testis	1060	1360	1240	4110	257	248			ovary/testis	424	16400	52700	95	135	97.8
	uterus/Epididymis	3550	NA	4320	25400	36900	62900			uterus/Epididymis	2970	6520	7320	48700	177	773			uterus/Epididymis	1610	15400	354	218	424	132
	ileum	18000	413	10100	4250	38500	39700			ileum	2590	1860	1840	62.1	1550	1040			ileum	1410000	620	188000	2930	176	659
	colon	7960	1110	1110	7370	19800	13300			colon	9320	5340	11700	33200	2540	490			colon	119	NA	1050	589	975	324
	triceps muscle of arm	62800	191000	2900	99000	134000	137000			triceps muscle of arm	185000	19000	217000	4980	11100	44500			triceps muscle of arm	226000	12000	57000	118000	110000	12600
	quadriceps femoris	60700	4490	96200	118000	156000	75200			quadriceps femoris	86800	19300	109000	34600	16600	35100			quadriceps femoris	118000	12000	75900	58100	76300	27400
	blood	146000	3640	6010	241000	670000	338000			blood	4700	3010	NA	1570	1340	NA			blood	NA	NA	NA	NA	166	NA
	N/A: Below detection limit
