# Supplementary material for: Preclinical evaluation of AAV9-coSMN1 gene therapy for spinal muscular atrophy: efficacy and safety in mouse models and non-human primates
Source: Mol Med. 2025 Apr 29;31:158. doi: 10.1186/s10020-025-01207-4 (PMC12042585; doi:10.1186/s10020-025-01207-4)
Supplement: Supplementary file 2 — Additional file 2. [file 10020_2025_1207_MOESM2_ESM.xlsx]

## Sheet: Sheet1
Anti-AAV9 Ab titer		Control group				Test group
		♂		♀		♂				♀
Animal number		2111191	2111192	2111193	2111194	2111195	2111196	2111197	2111198	2111199	2111200	2111201	2111202
Relative to Start Date	D14	-	-	-	-	+(1:6400)	+(1:1600)	+(1:1600)	+(1:1600)	+(1:6400)	+(1:1600)	+(1:6400)	+(1:1600)
	D28	-	-	-	-	+(1:6400)	+(1:6400)	+(1:800)	+(1:6400)	+(1:6400)	+(1:1600)	+(1:1600)	+(1:1600)
	D56		-		-			+(1:400)	+(1:6400)			+(1:800)	+(1:1600)
	D90		-		-			+(1:800)	+(1:25600)			+(1:400)	+(1:1600)
Anti-SMN Ab titer		Control group				Test group
		♂		♀		♂				♀
Animal number		2111191	2111192	2111193	2111194	2111195	2111196	2111197	2111198	2111199	2111200	2111201	2111202
Relative to Start Date	D14	-	-	-	-	-	-	-	-	-	-	-	-
	D28	-	-	-	-	+(1:800)	+(1:1600)	+(1:800)	+(1:6400)	+(1:200)	-	+(1:100)	+(1:1600)
	D56		-		-			+(1:800)	+(1:25600)			+(1:1600)	+(1:102400)
	D90		-		-			+(1:400)	+(1:25600)			+(1:1600)	+(1:102400)
“-” ADA negative，“+” ADA positive.
